# Supplementary material for: Brief Communication: Bed mapping of southern Greenland outlet glaciers using helicopter-borne ground penetrating radar (AIRETH)
Source: Copernicus journal article supplement (doi:10.5194/egusphere-2026-488), 2026-02-10
Supplement: Supplementary file [file egusphere-2026-488-AC2-supplement.pdf]

Supplement material for “Reply on RC2” - EGUSPHERE-2026-488 | Brief communication: **Bed mapping of southern Greenland outlet glaciers using helicopter-borne ground penetrating radar (AIRETH)**

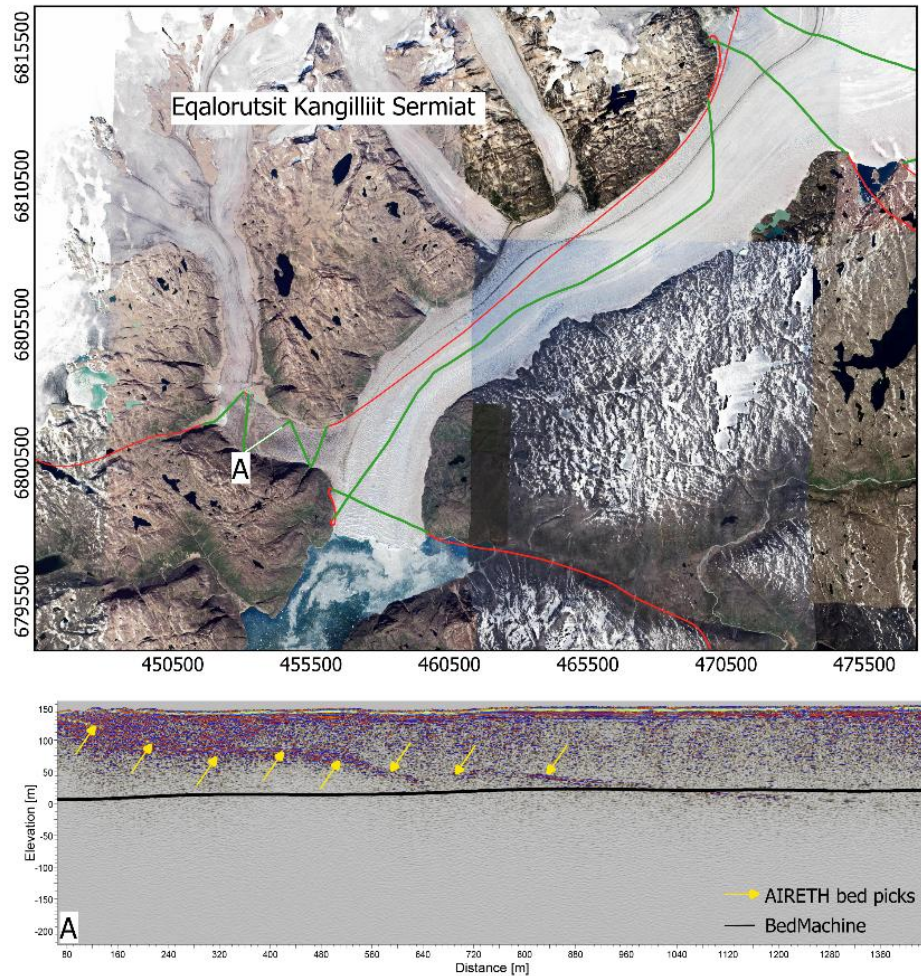

*Figure A. Example from a tributary of Eqalorutsit Kangilliit Sermiat illustrating a localized mismatch between AIRETH and BedMachine bed elevations. Top: map view showing the profile location. Bottom: corresponding radargram, with yellow arrows marking the AIRETH bed picks and the black line representing the BedMachine bed elevation.*
